# Supplementary material for: Optimizing mass eruption rate estimates by combining simple plume models
Source: Frontiers journal article supplement (doi:10.3389/feart.2023.1250686), 2023-08-31
Supplement: Table_1.XLSX [file Table_1.XLSX]

## Sheet: Sheet1
Volcano	ID	Event Year	Event -1me	Vent altitude (m a.s.l.)	Duration Best estimate (hours)	Duration Best Estimate Flag	Duration Uncertainty (hours)	Duration Uncertainty Flag	TEM Best estimate (kg)	TEM Best Estimate Flag	TEM Uncertainty (low; kg)	TEM Uncertainty (high; kg)	TEM Uncertainty Flag	Tephra Plume Top (km asl) Best estimate	Tephra Plume Top Best Estimate Flag	Tephra Plume Top (km asl) Uncertainty	Tephra Plume Top Uncertainty Flag	H (a.v.)	Temp guess	Average wind speed (m/s, ERA rea-1lyses)	Average Brunt-Väisälä frequency (/s, ERA rea-1lyses)	Average wind shear (s-1, ERA rea-1lyses)	Magma water content (wt.%) Best estimate	Magma water content (wt.%) Uncertainty	Tvent	p0	p_vent extrapolated	rock density	PI	plume type (1:buoyancy dom; 2: intermediate; 3:wind dominated	composition (1: basalt; 2: basaltic andesite; 3: andesite; 4:dacite/rhyolite)	eruption style (1:magmatic;2:phreatomagmatic;3:unknown;4:phreatic)	MER	duration (1: <1h; 2: <3h; 3: <12h; 4: <24h; 5: <72h; 6: >72h)	strength (1: <10^4; 2: <10^6; 3: <10^7; 4:>10^7)	case adj duration	case deo Tunc
Agung	1	1963	March	3142	5.25	1	1.75	1	374000000000	0	62400000000	250000000000	1	13	2	6.5	2	9.858	1070	3.57164	0.010003	0.000512982	4.3	2.7	10	101325	69340.4	2600	0.613535	1	2	1	1.97884e+07	3	4	7	250000000000
Agung	2	1963	May	3142	4.5	0	0.5	0	354000000000	0	-1	-1	-1	13	2	6.5	2	9.858	1070	8.76242	0.0100284	0.00156413	4.3	2.7	10	101325	69340.4	2600	0.250716	2	2	1	2.18519e+07	3	4	5	-1
Anatahan	3	2003	May	0	35	1	5	0	29300000000	0	-1	-1	-1	8	1	3	1	8	1050	6.43652	0.0119665	0.00106109	1.9	1.4	10	101325	101325	2600	0.330517	2	2	2	232540	5	2	30	-1
Anatahan	4	2003	June	0	48	1	7.5	1	9250000000	0	-1	-1	-1	2.5	0	1.5	2	2.5	1050	3.23094	0.011852	0.00191365	1.9	1.4	10	101325	101325	2600	0.203793	2	2	2	53530.1	5	2	55.5	-1
Augustine	5	2006	Event 9, 17 June	1252	0.0697	0	0.023001	2	1730000000	0	-1	-1	-1	13.5	0	1.5	0	12.248	950	5.99352	0.0152984	0.000759626	3.2	1.2	10	101325	87111.6	2600	0.694731	1	3	3	6.89463e+06	1	3	0.0697	-1
Bezymianny	6	1956	30 March	3085	2.5	1	1.5	1	500000000000	1	200000000000	200000000000	2	39.5	1	5.5	2	36.415	890	17.6993	0.0200173	0.000776498	2.5	1.5	10	101325	69819.2	2600	0.915201	1	2	1	5.55556e+07	2	4	1	200000000000
Bezymianny	7	1984	13 October	2882	30	1	9	2	11000000000	1	-1	-1	-1	7.5	0	2.5	1	4.618	1000	30.6751	0.0114091	0.0109351	Unknown	na	10	101325	71551.3	2600	0.0381687	3	2	3	101852	5	2	30	-1
Bezymianny	9	2006	24 December	2882	1	0	0.5	2	5100000000	0	1300000000	1900000000	0	13.5	0	2.5	0	10.618	1000	13.1797	0.01703	0.00232935	3.5	Unknown	10	101325	71551.3	2600	0.304887	2	2	3	1.41667e+06	2	3	0.5	1900000000
Bezymianny	10	2009	17 December	2882	2.9	0	1.75	1	3400000000	0	-1	-1	-1	11	1	3	1	8.118	1000	22.3528	0.0152514	0.00400006	Unknown	na	10	101325	71551.3	2600	0.123088	2	2	3	325670	2	2	1.15	-1
Calbuco	11	2015	22 April	2003	1.5	0	0.07	0	101000000000	0	56000000000	56000000000	0	20	0	3	0	17.997	1000	11.2481	0.0146058	0.00103321	3.5	0.5	10	101325	79561.4	2600	0.519321	1	2	1	1.87037e+07	2	4	1.5	56000000000
Calbuco	12	2015	23 April	2003	6.12	0	0.12	1	281000000000	0	104000000000	104000000000	0	21	0	3	0	18.997	1000	10.6423	0.014787	0.000899387	3.5	0.5	10	101325	79561.4	2600	0.586568	1	2	1	1.27542e+07	3	4	6	104000000000
Cerro Hudson	13	1991	P1, August 8	1905	16	1	1.5	2	200000000000	1	-1	-1	-1	10.5	1	2.5	1	8.595	1050	12.6673	0.0108487	0.00293692	1.2	1.1	10	101325	80508.2	2600	0.163579	2	1	2	3.47222e+06	4	3	17.5	-1
Cerro Hudson	14	1991	P2, August 12	1905	51	2	12	2	6030000000000	0	2200000000000	2200000000000	0	16	1	3	1	14.095	972	31.0276	0.0155096	0.00353724	2.2	1.4	10	101325	80508.2	2600	0.156569	2	1	3	3.28431e+07	5	4	51	2200000000000
Cerro Negro	15	1968	October-December	631	960	2	48	2	15000000000	0	5000000000	8000000000	1	2.3	1	1.3	1	1.669	900	6.80562	0.0120654	0.00654155	Unknown	na	10	101325	93893.2	2600	0.0657536	3	4	3	4340.28	6	1	960	5000000000
Cerro Negro	16	1971	3 February	670	134	2	24	2	42000000000	0	12000000000	52500000000	1	6.5	1	3	1	5.83	900	6.00831	0.0117373	0.00145762	4.1	1.8	10	101325	93452.2	2600	0.253089	2	4	1	87064.7	6	2	110	52500000000
Cerro Negro	17	1992	9 April	620	32.4	2	15.6	1	36000000000	0	24700000000	30600000000	1	5.5	1	2	1	4.88	900	8.79887	0.0116469	0.00236407	3.9	1.8	10	101325	94018	2600	0.143546	2	4	3	308642	5	2	32.4	24700000000
Cerro Negro	18	1995	29 November	630	84	2	12	1	3440000000	0	1010000000	-1	2	4.25	1	1.75	1	3.62	1050	10.0295	0.0119083	0.00418543	3.3	2	10	101325	93904.6	2600	0.0955146	3	4	3	11375.7	6	2	72	-1
Cerro Negro	19	1999	5 August	728	30	0	2	1	130000000	1	-1	-1	-1	4.5	1	2.5	2	3.772	900	6.16261	0.0120989	0.00239489	Unknown	na	10	101325	92800.1	2600	0.164567	2	4	1	1203.7	5	1	28	-1
Chaitén	20	2008	layer alpha	1122	6	0	2	2	4100000000	0	1400000000	1400000000	0	17	0	4	0	15.878	950	16.1989	0.0134558	0.00173946	Unknown	na	10	101325	88489.5	2600	0.293095	2	4	1	189815	3	2	4	1400000000
Chaitén	21	2008	layer A-M	1122	60	2	24	2	260000000000	0	20000000000	20000000000	0	10	0	2	1	8.878	950	22.3608	0.0113963	0.00446846	Unknown	na	10	101325	88489.5	2600	0.10055	2	4	1	1.2037e+06	5	3	60	20000000000
Chaitén	22	2008	layer beta	1122	3.5	2	2.5	2	220000000000	0	47300000000	47300000000	0	21	1	3	2	19.878	950	21.4157	0.0163526	0.00172752	Unknown	na	10	101325	88489.5	2600	0.3373	2	4	1	1.74603e+07	3	4	1	47300000000
Chikurachki	23	1986	November	1815	72	2	24	1	260000000000	2	130000000000	-1	2	9.5	0	3	1	7.685	1045	3.04006	0.012805	0.000564683	5.5	1.2	10	101325	81387.7	2600	0.719332	1	1	1	1.00309e+06	6	3	72	130000000000
Puyehue-Cordón Caulle	24	2011	layer A-F	1470	27	2	3	2	450000000000	0	200000000000	200000000000	0	11.8	0	1.9	0	10.33	900	18.0152	0.0124357	0.0030807	4.5	0.5	10	101325	84849	2600	0.158459	2	4	1	4.62963e+06	5	3	27	200000000000
Puyehue-Cordón Caulle	25	2011	layer H	1470	9	2	3	2	130000000000	0	80000000000	80000000000	0	11.1	1	1.1	1	9.63	900	39.6277	0.0116892	0.00686481	4.5	0.5	10	101325	84849	2600	0.063125	3	4	1	4.01235e+06	3	3	9	80000000000
Puyehue-Cordón Caulle	26	2011	layer K2	1470	9.25	2	2.75	2	28000000000	0	14000000000	14000000000	0	7.6	0	2.2	0	6.13	900	32.7777	0.00995196	0.00883281	4.5	0.5	10	101325	84849	2600	0.0413598	3	4	1	840841	3	2	9.25	14000000000
Cotopaxi	27	2015	1st phase	5987	14	2	10	2	158000000	0	45000000	45000000	0	12.5	1	2.5	2	6.513	950	5.97439	0.00969627	0.00120763	Unknown	na	10	101325	49184.4	2600	0.234898	2	3	4	3134.92	4	1	4	45000000
Cotopaxi	28	2015	2nd phase	5987	580	2	300	2	765000000	0	164000000	165000000	0	8.5	1	1.5	2	2.513	950	5.7604	0.0110585	0.00264286	Unknown	na	10	101325	49184.4	2600	0.107207	2	3	2	366.379	6	1	280	165000000
Cotopaxi	29	2015	3rd phase	5987	390	2	200	2	228000000	0	50000000	57000000	0	8	1	1.5	2	2.013	950	3.75013	0.0117604	0.00205583	Unknown	na	10	101325	49184.4	2600	0.140284	2	3	2	162.393	6	1	190	57000000
Cotopaxi	30	2015	4th phase	5987	500	2	280	2	34900000	0	6200000	6300000	0	7.5	1	1	2	1.513	950	4.03037	0.0119993	0.00436485	Unknown	na	10	101325	49184.4	2600	0.100101	2	3	2	19.3889	6	1	220	6300000
El Chichón	31	1982	A1	1150	5.5	0	0.5	1	500000000000	0	262000000000	262000000000	1	17.5	1	5	2	16.35	800	6.6305	0.0121929	0.000696176	7	3	10	101325	88190.9	2600	0.668136	1	3	2	2.52525e+07	3	4	5.5	262000000000
Etna	34	1998	22 July	3295	0.45	0	0.05	1	3000000000	1	2010000000	4100000000	0	11	1	3	2	7.705	1100	4.50388	0.0114026	0.000932087	Unknown	na	10	101325	68071.4	2600	0.433488	2	1	1	1.85185e+06	1	3	0.45	2010000000
Etna	35	2001	21 July	2570	73.5	0	12	1	1750000000	0	875000000	875000000	0	4.25	1	0.85	1	1.68	1100	11.2274	0.0132926	0.0113894	Unknown	na	10	101325	74297.7	2600	0.0442007	3	1	2	6613.76	6	1	73.5	875000000
Etna	36	2002	27 October	2750	10	0	1	1	870000000	0	-1	-1	-1	5.95	0	0.64	1	3.2	1100	11.7272	0.0106211	0.00599687	2.7	1.8	10	101325	72700.6	2600	0.0644042	3	1	2	24166.7	3	2	10	-1
Etna	37	2002	28 October	2750	6	0	1	1	1050000000	0	-1	-1	-1	6.95	0	0.84	1	4.2	1100	10.0144	0.00976562	0.00388738	2.7	1.8	10	101325	72700.6	2600	0.091015	3	1	2	48611.1	3	2	6	-1
Etna	38	2002	31 October	2750	4	0	1	1	450000000	0	-1	-1	-1	6.45	0	0.74	1	3.7	1100	11.3451	0.00998876	0.00566598	Unknown	na	10	101325	72700.6	2600	0.0723926	3	1	2	31250	3	2	4	-1
Etna	39	2002	4 November	2750	18	0	1	1	1390000000	0	-1	-1	-1	5.65	0	0.58	1	2.9	1100	11.4921	0.0118311	0.00594711	Unknown	na	10	101325	72700.6	2600	0.0663455	3	1	2	21450.6	4	2	18	-1
Etna	40	2006	16 November	3315	8	1	3	0	7000000	0	-1	-1	-1	3.9	0	0.5	0	0.585	1100	6.3718	0.0158617	0.0166027	Unknown	na	10	101325	67907.2	2600	0.0323616	3	1	1	243.056	3	1	8	-1
Etna	41	2006	24 November	2800	11.5	0	1.5	0	180000000	0	100000000	100000000	1	4.8	0	0.6	0	2	1100	8.13423	0.0142733	0.00609029	Unknown	na	10	101325	72263.1	2600	0.0779874	3	1	1	4347.83	3	1	11.5	100000000
Etna	42	2011	12 January	3200	1.66	0	0.17	1	150000000	0	40000000	40000000	0	9.2	0	2.4	1	6	1100	9.47478	0.0104995	0.00290419	Unknown	na	10	101325	68856.6	2600	0.147754	2	1	1	25100.4	2	2	1.49	40000000
Etna	43	2013	23 February	3300	1.1	0	0.11	2	2000000000	0	1000000000	1000000000	0	8.1	0	1.5	1	4.8	1100	31.2054	0.0099706	0.0107734	Unknown	na	10	101325	68030.3	2600	0.0340817	3	1	1	505051	2	2	1.1	1000000000
Etna	44	2013	26 October	3300	5.5	1	2.5	1	225000000	0	76000000	76000000	0	8	0	2	2	4.7	1100	7.22779	0.00980322	0.00281024	Unknown	na	10	101325	68030.3	2600	0.14166	2	1	1	11363.6	3	2	3	76000000
Etna	45	2013	23 November	3300	0.62	0	0.21	0	1300000000	0	1100000000	1100000000	0	10.5	0	2.5	0	7.2	1100	34.4145	0.0126254	0.00858604	Unknown	na	10	101325	68030.3	2600	0.0586979	3	1	1	582437	1	2	0.62	1100000000
Etna	46	2016	18 & 19 May	3300	5.17	0	1.08	0	35500000	0	24500000	24500000	0	5.5	0	1.5	0	2.2	1100	17.238	0.0111715	0.0117377	Unknown	na	10	101325	68030.3	2600	0.0316835	3	1	1	1907.37	3	1	4.09	24500000
Etna	47	2016	21 May	3300	2.17	0	0.22	1	5550000	0	950000	950000	0	6	0	1	2	2.7	1100	23.3263	0.0106976	0.0138776	Unknown	na	10	101325	68030.3	2600	0.0275164	3	1	1	710.445	2	1	1.95	950000
Eyjafjallajökull	48	2010	14-16 April	1660	71	1	12	1	130000000000	0	30000000000	30000000000	0	5.7	0	0.6	1	4.04	1000	24.4968	0.0128148	0.0102286	1.7	Unknown	10	101325	82925	2600	0.0469646	3	2	2	508607	5	2	71	30000000000
Eyjafjallajökull	49	2010	17 April	1660	30	1	12	2	40000000000	0	10000000000	10000000000	0	5.6	0	0.6	1	3.94	1000	12.07	0.013823	0.00534569	1.7	Unknown	10	101325	82925	2600	0.100272	2	2	2	370370	5	2	42	10000000000
Eyjafjallajökull	50	2010	18 April - 21 May	1660	822	0	12.4	1	255000000000	0	127000000000	127000000000	0	4.6	0	0.5	0	2.94	1000	5.49535	0.0129033	0.00348444	1.7	Unknown	10	101325	82925	2600	0.153405	2	2	1	86171.9	6	2	834.4	127000000000
Eyjafjallajökull	51	2010	4-8 May	1660	90	0	0.5	0	29000000000	0	9700000000	9700000000	0	5.1	0	0.5	0	3.44	1000	12.6779	0.0123236	0.00610541	1.7	Unknown	10	101325	82925	2600	0.0743082	3	2	1	89506.2	6	2	90	9700000000
Fuego	52	1971	14 September	3763	11.125	0	1.125	1	189000000000	0	108000000000	-1	2	12	1	5	2	8.237	1100	6.0763	0.0101953	0.0013641	Unknown	na	10	101325	64332.1	2600	0.307126	2	1	3	4.7191e+06	3	3	11.125	108000000000
Grímsvötn	54	2004	Unit C	1400	18.1	0	0.5	2	27900000000	1	13900000000	13900000000	1	11	0	2.5	1	9.6	1100	27.0897	0.012299	0.00464873	Unknown	na	10	101325	85569	2600	0.0968557	3	1	2	428177	4	2	17.6	13900000000
Grímsvötn	55	2004	Unit E	1400	12.9	0	0.5	2	9940000000	1	4970000000	4970000000	1	8.8	0	2	1	7.4	1100	26.4526	0.0108501	0.00609079	Unknown	na	10	101325	85569	2600	0.0674505	3	1	2	214040	4	2	12.4	4970000000
Grímsvötn	56	2011	21 May	1450	27	1	3	1	729000000000	0	189000000000	189000000000	0	16	0	4	1	14.55	1100	5.31998	0.0167542	0.000548238	Unknown	na	10	101325	85054.1	2600	1.01827	1	1	2	7500000	5	3	27	189000000000
Hekla	57	1947	29 March brown-grey tephra	1447	0.5	0	0.1	2	119000000000	0	38000000000	38000000000	2	28	1	5	2	26.553	1000	31.9289	0.0185443	0.00233343	Unknown	na	10	101325	85084.9	2600	0.342711	2	2	3	6.61111e+07	1	4	0.4	38000000000
Hekla	58	1947	29 March brown-black tephra	1447	2	1	1.5	1	40000000000	0	20000000000	20000000000	2	16	1	6	2	14.553	1000	17.7929	0.0158336	0.00232042	Unknown	na	10	101325	85084.9	2600	0.287788	2	2	3	5.55556e+06	2	3	0.5	20000000000
Hekla	59	1970	5 May	630	2.25	1	0.75	0	45000000000	0	-1	-1	-1	14	0	3	1	13.37	1050	22.0191	0.0155067	0.00257688	Unknown	na	10	101325	93904.6	2600	0.209238	2	2	3	5.55556e+06	2	3	1.5	-1
Hekla	60	1980	17 August	1490	4	1	2	1	42000000000	0	-1	-1	-1	14	1	3	2	12.51	1000	12.307	0.0148098	0.00176447	Unknown	na	10	101325	84644.4	2600	0.334536	2	2	3	2.91667e+06	3	3	2	-1
Hekla	61	1991	17 January	1050	1	0	0.2	1	9800000000	0	1200000000	1200000000	0	11.5	0	1.2	0	10.45	1000	31.0485	0.0145024	0.00527801	1.2	0.4	10	101325	89262	2600	0.108468	2	2	3	2.72222e+06	2	3	1	1200000000
Hekla	62	2000	26 February	1491	3.25	1	1.75	1	10000000000	1	-1	-1	-1	11	0	2	0	9.509	1000	18.9231	0.0125486	0.00394882	2.4	0.3	10	101325	84634.2	2600	0.140128	2	2	2	854701	3	2	1.5	-1
St. Helens	63	1980	18 May co-blast plume	2550	0.5	0	0.125	1	259000000000	0	160000000000	160000000000	1	28.5	0	5	2	25.95	900	11.1977	0.0175695	0.000449597	Unknown	na	10	101325	74477.3	2600	0.904807	1	4	1	1.43889e+08	1	4	0.5	160000000000
St. Helens	64	1980	18 May plinian	2550	9.5	0	0.95	2	259000000000	0	160000000000	160000000000	1	16.5	0	3	0	13.95	930	18.6755	0.0141632	0.0020782	4.6	1.1	10	101325	74477.3	2600	0.2351	2	4	1	7.5731e+06	3	3	9.5	160000000000
St. Helens	65	1980	25 May	2550	12	1	6.5	1	42000000000	0	15000000000	15000000000	2	9	1	3	1	6.45	900	8.81779	0.011346	0.00250868	Unknown	na	10	101325	74477.3	2600	0.184429	2	4	1	972222	4	2	12	15000000000
St. Helens	66	1980	12 June	2550	3.24	0	0.42	0	45000000000	0	16000000000	16000000000	2	10	1	4	1	7.45	900	12.5078	0.00970103	0.00266338	Unknown	na	10	101325	74477.3	2600	0.128404	2	4	1	3.85802e+06	3	3	3.24	16000000000
St. Helens	67	1980	22 July	2550	2.66	0	0.53	2	4000000000	0	1400000000	1400000000	2	12	1	3	2	9.45	900	17.7533	0.0108394	0.00311243	Unknown	na	10	101325	74477.3	2600	0.128217	2	4	1	417711	2	2	2.13	1400000000
St. Helens	68	2005	8 March	2100	0.45	0	0.25	0	250000000	2	125000000	650000000	2	8.5	0	2.5	1	6.4	900	15.9355	0.0109029	0.00437207	Unknown	na	10	101325	78635.1	2600	0.0973069	3	4	4	154321	1	2	0.2	650000000
Kasatochi	69	2008	7 August	300	13.25	0	2.75	0	280000000000	0	142000000000	-1	2	14	0	4	0	13.7	1100	11.1096	0.0143308	0.00128746	6	0.9	10	101325	97721	2600	0.392715	2	1	1	5.87002e+06	4	3	13.25	142000000000
Kelut	70	1951	31 August	1731	9.5	1	2	1	120000000000	1	-1	-1	-1	10	1	4	2	8.269	1000	7.12656	0.0114257	0.00133626	Unknown	na	10	101325	82217.2	2600	0.294607	2	3	3	3.50877e+06	3	3	9.5	-1
Kelut	71	1990	Unit P	1731	4	0	1	2	100000000000	1	-1	-1	-1	12	0	3	2	10.269	1000	3.33949	0.0106211	0.000419563	Unknown	na	10	101325	82217.2	2600	0.725781	1	3	1	6.94444e+06	3	3	4	-1
Kelut	72	2014	Unit B	1731	2.325	0	0.7	0	497000000000	0	176000000000	176000000000	0	23	0	3	0	21.269	1000	13.0876	0.0151546	0.000982471	Unknown	na	10	101325	82217.2	2600	0.547295	1	3	1	5.93787e+07	2	4	2.325	176000000000
Láscar	73	1993	18 April	5450	30	1	18	1	250000000000	1	-1	-1	2	15	1	7	1	9.55	1000	26.7066	0.0110003	0.00459044	Unknown	na	10	101325	52478.5	2600	0.0874134	3	3	1	2.31481e+06	5	3	30	-1
Merapi	74	2010	4 November	2968	36	1	12	1	22000000000	1	9130000000	23400000000	1	17	0	3	2	14.032	1000	5.67971	0.0108671	0.000829351	5	1	10	101325	70812.3	2600	0.596615	1	3	1	169753	5	2	24	23400000000
Miyakejima	75	2000	8 July	775	0.32	0	0.08	2	450000000	0	-1	-1	-1	2.3	0	0.7	1	1.525	1100	17.5934	0.0130221	0.0168939	Unknown	na	10	101325	92275.1	2600	0.0250834	3	1	4	390625	1	2	0.4	-1
Miyakejima	76	2000	10 August	775	6.25	0	2.25	0	1230000000	0	-1	-1	-1	9	0	3	2	8.225	1100	6.85838	0.0112175	0.00152246	Unknown	na	10	101325	92275.1	2600	0.298949	2	1	2	54666.7	3	2	4	-1
Miyakejima	77	2000	18 August	775	3.43	0	1.12	0	10500000000	0	-1	-1	-1	16	0	4	2	15.225	1100	8.58043	0.0120487	0.00113039	2.2	1.4	10	101325	92275.1	2600	0.475091	2	1	2	850340	3	2	2.31	-1
Soufrière Hills Montserrat	78	1997	26 September	915	1	0	0.3	2	550000000	0	185000000	185000000	1	11.3	0	3	2	10.385	1000	6.41727	0.0108008	0.00106917	Unknown	na	10	101325	90728.7	2600	0.388417	2	2	1	152778	2	2	0.7	185000000
Nakadake - Asosan	79	2015	14 September	1592	0.075	1	0.017	1	27000000	0	-1	-1	-1	3.59	0	0.5	2	1.998	1000	3.12169	0.014864	0.00183841	Unknown	na	10	101325	83608.5	2600	0.211412	2	2	2	100000	1	2	0.092	-1
Nevado del Ruiz	80	1985	13 November	5400	0.58	1	0.25	1	35000000000	0	-1	-1	-1	15.9	0	5.25	2	10.5	1025	12.374	0.00947375	0.00219857	2.5	1.5	10	101325	52796.2	2600	0.178644	2	2	1	1.67625e+07	1	4	0.83	-1
Ngauruhoe - Tongariro	81	1975	19 February	2291	1.25	1	0.33333	1	2860000000	0	-1	-1	-1	11	0	2	2	8.709	1000	12.5988	0.00996094	0.00303189	Unknown	na	10	101325	76842.7	2600	0.153013	2	2	4	635556	2	2	0.91667	-1
Okmok	82	2008	Basal unit	1073	4.03	0	0.25	0	203000000000	0	-1	-1	-1	16.5	0	1.5	2	15.427	1120	9.11413	0.01453	0.000982536	1.7	1	10	101325	89014.5	2600	0.546537	1	1	2	1.39923e+07	3	4	4.03	-1
Okmok	83	2008	Upper layer	1073	908	0	48	2	960000000000	0	-1	-1	-1	6.7	1	3.7	1	5.627	1100	7.55379	0.0130726	0.00247156	Unknown	na	10	101325	89014.5	2600	0.216402	2	1	2	293686	6	2	908	-1
Ontakesan	84	2014	27 September	2725	6	0	0.5	2	1000000000	0	514000000	941000000	0	6	0	1.5	1	3.275	1000	7.39796	0.0139121	0.00465592	Unknown	na	10	101325	72920.4	2600	0.136861	2	2	4	46296.3	3	2	6	514000000
Pinatubo	85	1991	Layer A	1750	0.88	0	0.28	1	14000000000	0	-1	-1	2	19	0	3	2	17.25	900	10.0701	0.0129143	0.00110073	Unknown	na	10	101325	82028.9	2600	0.491602	2	4	1	4.41919e+06	1	3	0.6	-1
Pinatubo	86	1991	Layer C	1750	6	0	3	0	4070000000000	0	1350000000000	1350000000000	0	32	0	3	1	30.25	900	15.998	0.0171193	0.00100437	6	1	10	101325	82028.9	2600	0.719339	1	4	1	1.88426e+08	3	4	6	1350000000000
Popocatépetl	87	1996	30 April	5452	0.13	0	0.016	2	530000000	0	-1	-1	-1	9.45	0	1	2	3.998	1000	6.73356	0.0101047	0.00344095	Unknown	na	10	101325	52465.8	2600	0.133324	2	2	1	1.13248e+06	1	3	0.146	-1
Popocatépetl	88	1996	28 October	5452	0.467	1	0.33	1	20000000	0	-1	-1	-1	8.5	0	1	0	3.048	1000	9.93129	0.0101384	0.00385222	1.9	0.8	10	101325	52465.8	2600	0.0691458	3	2	1	11896.3	1	2	0.467	-1
Popocatépetl	89	1997	30 June	5452	2.16	1	1.58	1	1100000000	0	-1	-1	-1	13.5	0	2	2	8.048	1000	19.8653	0.00986426	0.00513179	1.8	0.8	10	101325	52465.8	2600	0.0888066	3	2	1	141461	2	2	0.58	-1
Quizapu	90	1932	10 April	3150	22	0	4	0	9960000000000	0	7000000000000	15700000000000	0	23	1	7	1	19.85	870	22.0449	0.0177035	0.00143594	5	1	10	101325	69273.4	2600	0.354242	2	2	3	1.25758e+08	4	4	22	7000000000000
Redoubt	91	1989	14 December	3108	0.383333	0	0.0383333	2	750000000	0	350000000	350000000	0	9	0	3	1	5.892	1000	41.8336	0.0119438	0.0121187	0.25	0.15	10	101325	69625.6	2600	0.0373824	3	2	2	543478	1	2	0.383333	350000000
Redoubt	92	1989	15 December	3108	1.03333	0	0.103333	2	21200000000	0	6150000000	6150000000	0	11	2	4	2	7.892	1000	30.6177	0.0128595	0.00678063	0.25	0.15	10	101325	69625.6	2600	0.073659	3	2	2	5.69892e+06	2	3	1.13667	6150000000
Redoubt	93	1989	19 December	3108	0.15	0	0.015	2	500000000	0	100000000	100000000	0	6.5	0	2.5	0	3.392	1000	10.098	0.0156448	0.00587815	0.25	0.15	10	101325	69625.6	2600	0.116782	2	2	2	925926	1	2	0.165	100000000
Redoubt	94	1990	2 January	3108	1.45	0	0.145	2	39000000000	0	-1	-1	-1	12	1	2	1	8.892	1000	8.28594	0.0151557	0.00162179	0.25	0.15	10	101325	69625.6	2600	0.361428	2	2	3	7.47126e+06	2	3	1.595	-1
Redoubt	95	1990	8 January	3108	0.25	0	0.025	2	7450000000	0	-1	-1	-1	11.5	1	2.5	1	8.392	1000	13.5039	0.0170814	0.00239991	0.25	0.15	10	101325	69625.6	2600	0.235895	2	2	3	8.27778e+06	1	3	0.275	-1
Redoubt	96	1990	16 January	3108	0.216667	0	0.0216667	2	3500000000	0	-1	-1	-1	11.5	0	2.5	1	8.392	1000	33.7607	0.0133839	0.00658194	0.25	0.15	10	101325	69625.6	2600	0.0739305	3	2	3	4.48718e+06	1	3	0.216667	-1
Redoubt	97	1990	15 February	3108	0.333333	0	0.0333333	2	8750000000	0	-1	-1	-1	11	0	2	1	7.892	1000	34.3254	0.0112231	0.00720162	0.25	0.15	10	101325	69625.6	2600	0.0573419	3	2	3	7.29167e+06	1	3	0.366667	-1
Redoubt	98	1990	21 February	3108	0.1	0	0.01	2	2500000000	0	-1	-1	-1	10.5	0	1.5	1	7.392	1000	41.6234	0.0164051	0.0094891	0.25	0.15	10	101325	69625.6	2600	0.0647426	3	2	3	6.94444e+06	1	3	0.11	-1
Redoubt	99	1990	24 February	3108	0.0666667	0	0.00666667	2	2000000000	0	-1	-1	-1	8.5	1	2	2	5.392	1000	14.4308	0.00958659	0.00408519	0.25	0.15	10	101325	69625.6	2600	0.0795997	3	2	3	8.33333e+06	1	3	0.0733333	-1
Redoubt	100	1990	28 February	3108	0.0833333	0	0.00833333	2	1700000000	0	-1	-1	-1	8.5	1	2.5	1	5.392	1000	31.1207	0.0104276	0.00973639	0.25	0.15	10	101325	69625.6	2600	0.040149	3	2	3	5.66667e+06	1	3	0.0916667	-1
Redoubt	101	1990	4 March	3108	0.133333	0	0.0133333	2	4450000000	0	-1	-1	-1	12.5	0	3	2	9.392	1000	18.6648	0.0157718	0.00374505	0.25	0.15	10	101325	69625.6	2600	0.176362	2	2	3	9.27083e+06	1	3	0.146667	-1
Redoubt	102	1990	9 March	3108	0.166667	0	0.0833333	2	1350000000	0	-1	-1	-1	10.5	0	2.5	2	7.392	1000	14.5593	0.0109021	0.00314953	0.25	0.15	10	101325	69625.6	2600	0.123004	2	2	3	2.25e+06	1	3	0.25	-1
Redoubt	103	1990	14 March	3108	0.233333	0	0.0233333	2	1600000000	0	-1	-1	-1	7	1	2	2	3.892	1000	5.72308	0.0100449	0.00302234	0.25	0.15	10	101325	69625.6	2600	0.151802	2	2	3	1.90476e+06	1	3	0.256667	-1
Redoubt	104	1990	23 March	3108	0.133333	0	0.0133333	2	500000000	0	-1	-1	-1	9	0	1.5	1	5.892	1000	19.4339	0.0101134	0.0054268	0.25	0.15	10	101325	69625.6	2600	0.0681373	3	2	3	1.04167e+06	1	3	0.133333	-1
Redoubt	105	1990	29 March	3108	0.116667	0	0.0116667	2	1750000000	0	-1	-1	-1	12	2	3	2	8.892	1000	18.9917	0.0156312	0.00358412	0.25	0.15	10	101325	69625.6	2600	0.162635	2	2	3	4.16667e+06	1	3	0.116667	-1
Redoubt	106	1990	6 April	3108	0.116667	0	0.0583333	2	900000000	0	-1	-1	-1	9	0	2	2	5.892	1000	10.5881	0.0102506	0.00388946	0.25	0.15	10	101325	69625.6	2600	0.12676	2	2	3	2.14286e+06	1	3	0.175	-1
Redoubt	107	1990	15 April	3108	0.133333	0	0.0666667	2	1700000000	0	-1	-1	-1	10	0	2	0	6.892	1000	16.0717	0.0102648	0.0037836	0.25	0.15	10	101325	69625.6	2600	0.0978184	3	2	3	3.54167e+06	1	3	0.2	-1
Redoubt	108	1990	21 April	3108	0.0666667	0	0.0333333	2	1150000000	0	-1	-1	-1	10	1	2.5	1	6.892	1000	4.76376	0.0113736	0.00102301	0.25	0.15	10	101325	69625.6	2600	0.365663	2	2	3	4.79167e+06	1	3	0.1	-1
Redoubt	109	2009	Events 1-4	2300	0.83	0	0.29	0	9600000000	0	-1	-1	-1	12.9	0	2	1	10.6	925	16.5257	0.0163324	0.0023815	4.5	0.5	10	101325	76759.3	2600	0.2328	2	2	1	3.21285e+06	1	3	0.83	-1
Redoubt	110	2009	Event 5	2300	0.275	0	0.058	0	4400000000	0	-1	-1	-1	14.9	0	2	1	12.6	925	12.7603	0.016629	0.00142674	4.5	0.5	10	101325	76759.3	2600	0.364892	2	2	1	4.44444e+06	1	3	0.275	-1
Redoubt	111	2009	Event 6	2300	0.258	0	0.04	0	15100000000	0	-1	-1	-1	18.3	0	2	1	16	925	10.1712	0.0169579	0.000896187	4.5	0.5	10	101325	76759.3	2600	0.592798	1	2	1	1.62575e+07	1	4	0.258	-1
Redoubt	112	2009	Events 7-8	2300	0.233	0	0.04	0	4600000000	0	-1	-1	-1	18.1	0	2	1	15.8	925	9.07445	0.0170505	0.00101043	4.5	0.5	10	101325	76759.3	2600	0.659721	1	2	1	5.48402e+06	1	3	0.193	-1
Redoubt	113	2009	Events 9-18	2300	1	1	0.35	1	13200000000	0	-1	-1	-1	12.9	0	2	1	10.6	925	6.50737	0.0154122	0.00112411	4.5	0.5	10	101325	76759.3	2600	0.557896	1	2	1	3.66667e+06	2	3	1	-1
Redoubt	114	2009	Event 19	2300	0.5	1	0.225	1	7800000000	0	-1	-1	-1	14.9	0	2	1	12.6	925	23.4103	0.0166419	0.00309521	4.5	0.5	10	101325	76759.3	2600	0.199046	2	2	1	4.33333e+06	1	3	0.275	-1
Reventador	115	2002	3 November	3562	0.75	0	0.083	2	135000000000	2	-1	-1	-1	17.3	0	3.3	0	13.738	950	5.80173	0.011763	0.000746575	5.1	2	10	101325	65912.3	2600	0.618973	1	2	2	50000000	1	4	0.833	-1
Ruapehu	116	1995	11 October	2797	8	0	1	2	32500000000	0	-1	-1	-1	11	0	1	1	8.203	1050	19.0749	0.010746	0.00367213	1.4	0.4	10	101325	72289.3	2600	0.102694	2	2	2	1.12847e+06	3	3	8	-1
Ruapehu	117	1995	14 October	2797	6.5	1	1.5	1	6500000000	0	-1	-1	-1	11	0	1	0	8.203	1050	27.5392	0.00961665	0.0050443	1.4	0.4	10	101325	72289.3	2600	0.0636551	3	2	2	277778	3	2	5	-1
Ruapehu	118	1996	17 June	2797	12.5	2	6	1	4510000000	0	1810000000	2690000000	0	8	0	1.5	1	5.203	1050	24.2283	0.00893118	0.00740296	1.5	0.8	10	101325	72289.3	2600	0.0426213	3	2	2	100222	4	2	12.5	1810000000
Santa Maria	119	1902	25 October	3772	19	0	1	0	16000000000000	0	7300000000000	52000000000000	0	28	1	14	2	24.228	900	7.26048	0.0173351	0.000628351	3.5	0.4	10	101325	64262.3	2600	1.28548	1	4	1	2.33918e+08	4	4	19	7300000000000
Sarychev Peak	120	2009	12-16 June	1450	87	1	14.5	1	400000000000	1	-1	-1	-1	12	1	4	1	10.55	1015	3.56415	0.0124773	0.000391806	4	1	10	101325	85054.1	2600	0.820741	1	2	3	1.27714e+06	6	3	72.5	-1
Shinmoedake - Kirishimayaya	121	2011	Phase SP1+SP2	1421	6	0	1	0	14400000000	1	8100000000	26300000000	0	7.3	0	1.3	0	5.879	970	31.231	0.0130168	0.00945777	4.4	0.6	10	101325	85352.4	2600	0.0544512	3	2	1	666667	3	2	6	8100000000
Shinmoedake - Kirishimayaya	122	2011	Phase SP3	1421	2	0	0.3	0	2400000000	0	1700000000	6700000000	0	7.4	0	1	0	5.979	970	25.5195	0.0123069	0.00817187	4.4	0.6	10	101325	85352.4	2600	0.0640757	3	2	1	333333	2	2	2	1700000000
Shishaldin	123	1999	19 April	2857	2.65	0	1.35	0	36400000000	0	22600000000	37000000000	2	14.5	0	2	1	11.643	1100	8.90264	0.0162477	0.000950631	Unknown	na	10	101325	71767.6	2600	0.4722	2	1	1	3.81551e+06	2	3	2.65	22600000000
Soufrière St. Vincent	124	1979	26 April	1220	0.103	0	0.0167	2	1250000000	1	-1	-1	-1	14	0	2	2	12.78	1000	6.85362	0.0102538	0.00105745	Unknown	na	10	101325	87448.8	2600	0.424894	2	2	2	3.37109e+06	1	3	0.103	-1
Spurr	125	1992	27 June	2309	4.05	0	1	1	31200000000	0	-1	-1	-1	14.5	0	2	1	12.191	1000	19.9652	0.014569	0.00240388	Unknown	na	10	101325	76675.9	2600	0.197689	2	2	1	2.13992e+06	3	3	3.05	-1
Spurr	126	1992	18 August	2309	2.5	0	1	0	36400000000	0	-1	-1	-1	13.7	0	2	1	11.391	1000	13.3241	0.0128825	0.00210135	Unknown	na	10	101325	76675.9	2600	0.244745	2	2	1	4.04444e+06	2	3	2.5	-1
Spurr	127	1992	17 September	2309	3.28	0	0.32	0	39000000000	0	-1	-1	-1	13.9	0	2	1	11.591	1000	23.0955	0.014161	0.00337026	Unknown	na	10	101325	76675.9	2600	0.157934	2	2	1	3.30285e+06	3	3	2.96	-1
Stromboli	128	2003	5 April	924	0.0069	0	0.0039	0	125000000	0	-1	-1	-1	5	0	1	2	4.076	1000	13.1108	0.010506	0.00500332	1.5	1	10	101325	90630.1	2600	0.0725821	3	3	1	5.03221e+06	1	3	0.0108	-1
Tungurahua	129	2001	4 August	5023	348	0	60	0	6150000000	0	3600000000	3600000000	0	8.4	0	1	1	3.377	1000	7.27734	0.0124363	0.00241241	Unknown	na	10	101325	55254.6	2600	0.128244	2	2	1	4909	6	1	288	3600000000
Tungurahua	130	2006	17 August	5023	5	0	1	0	24900000000	0	3240000000	3240000000	0	16	1	3	1	10.977	1000	6.19213	0.010114	0.000745584	1.9	1.5	10	101325	55254.6	2600	0.398434	2	2	1	1.38333e+06	3	3	5	3240000000
Tungurahua	131	2013	14 July	5023	1	0	0.333	1	672000000	0	50000000	50000000	0	11.4	1	2.3	1	6.377	1000	8.73581	0.0103376	0.0021283	Unknown	na	10	101325	55254.6	2600	0.167695	2	2	1	186667	2	2	0.667	50000000
Tungurahua	132	2014	1 February	5023	0.43	1	0.27	1	5400000000	0	810000000	23700000000	0	13.7	0	5.48	2	8.677	1000	5.78591	0.00934254	0.00114749	Unknown	na	10	101325	55254.6	2600	0.311351	2	2	1	3.48837e+06	1	3	0.43	810000000
Tyatya	133	1973	15 July	500	96	2	72	2	260000000000	1	-1	-1	-1	8	2	3	2	7.5	1100	16.3555	0.0130826	0.0039507	Unknown	na	10	101325	95389.9	2600	0.133315	2	1	1	752315	6	2	96	-1
Villarrica	134	2015	3 March	2847	0.42	0	0.15	1	1420000000	0	733000000	600000000	0	9.1	1	3	1	6.253	1100	6.60684	0.0100446	0.00145614	Unknown	na	10	101325	71854.3	2600	0.211258	2	1	1	939153	1	2	0.42	733000000
