# Supplementary material for: Optimizing mass eruption rate estimates by combining simple plume models
Source: Frontiers journal article supplement (doi:10.3389/feart.2023.1250686), 2023-08-31
Supplement: Table_2.XLSX [file Table_2.XLSX]

## Sheet: Sheet1
Volcano	ID	Event Year	Event -1me	Vent altitude (m a.s.l.)	Duration Best estimate (hours)	Duration Best Estimate Flag	Duration Uncertainty (hours)	Duration Uncertainty Flag	TEM Best estimate (kg)	TEM Best Estimate Flag	TEM Uncertainty (low; kg)	TEM Uncertainty (high; kg)	TEM Uncertainty Flag	Tephra Plume Top (km asl) Best estimate	Tephra Plume Top Best Estimate Flag	Tephra Plume Top (km asl) Uncertainty	Tephra Plume Top Uncertainty Flag	H (a.v.)	Temp guess	Average wind speed (m/s, ERA rea-1lyses)	Average Brunt-Väisälä frequency (/s, ERA rea-1lyses)	Average wind shear (s-1, ERA rea-1lyses)	Magma water content (wt.%) Best estimate	Magma water content (wt.%) Uncertainty	Tvent	p0	p_vent extrapolated	rock density	PI	plume type (1:buoyancy dom; 2: intermediate; 3:wind dominated	composition (1: basalt; 2: basaltic andesite; 3: andesite; 4:dacite/rhyolite)	eruption style (1:magmatic;2:phreatomagmatic;3:unknown;4:phreatic)	MER	duration (1: <1h; 2: <3h; 3: <12h; 4: <24h; 5: <72h; 6: >72h)	strength (1: <10^4; 2: <10^6; 3: <10^7; 4:>10^7)	case adj duration	case deo Tunc
Agung	1	1963	March	3142	5.25	1	1.75	1	374000000000	0	62400000000	250000000000	1	13	2	6.5	2	9.858	1070	3.57164	0.010003	0.000512982	4.3	2.7	10	101325	69340.4	2600	0.613535	1	2	1	1.97884e+07	3	4	7	250000000000
Bezymianny	6	1956	30 March	3085	2.5	1	1.5	1	500000000000	1	200000000000	200000000000	2	39.5	1	5.5	2	36.415	890	17.6993	0.0200173	0.000776498	2.5	1.5	10	101325	69819.2	2600	0.915201	1	2	1	5.55556e+07	2	4	1	200000000000
Bezymianny	9	2006	24 December	2882	1	0	0.5	2	5100000000	0	1300000000	1900000000	0	13.5	0	2.5	0	10.618	1000	13.1797	0.01703	0.00232935	3.5	Unknown	10	101325	71551.3	2600	0.304887	2	2	3	1.41667e+06	2	3	0.5	1900000000
Calbuco	11	2015	22 April	2003	1.5	0	0.07	0	101000000000	0	56000000000	56000000000	0	20	0	3	0	17.997	1000	11.2481	0.0146058	0.00103321	3.5	0.5	10	101325	79561.4	2600	0.519321	1	2	1	1.87037e+07	2	4	1.5	56000000000
Calbuco	12	2015	23 April	2003	6.12	0	0.12	1	281000000000	0	104000000000	104000000000	0	21	0	3	0	18.997	1000	10.6423	0.014787	0.000899387	3.5	0.5	10	101325	79561.4	2600	0.586568	1	2	1	1.27542e+07	3	4	6	104000000000
Cerro Hudson	14	1991	P2, August 12	1905	51	2	12	2	6030000000000	0	2200000000000	2200000000000	0	16	1	3	1	14.095	972	31.0276	0.0155096	0.00353724	2.2	1.4	10	101325	80508.2	2600	0.156569	2	1	3	3.28431e+07	5	4	51	2200000000000
Cerro Negro	15	1968	October-December	631	960	2	48	2	15000000000	0	5000000000	8000000000	1	2.3	1	1.3	1	1.669	900	6.80562	0.0120654	0.00654155	Unknown	na	10	101325	93893.2	2600	0.0657536	3	4	3	4340.28	6	1	960	5000000000
Cerro Negro	16	1971	3 February	670	134	2	24	2	42000000000	0	12000000000	52500000000	1	6.5	1	3	1	5.83	900	6.00831	0.0117373	0.00145762	4.1	1.8	10	101325	93452.2	2600	0.253089	2	4	1	87064.7	6	2	110	52500000000
Cerro Negro	17	1992	9 April	620	32.4	2	15.6	1	36000000000	0	24700000000	30600000000	1	5.5	1	2	1	4.88	900	8.79887	0.0116469	0.00236407	3.9	1.8	10	101325	94018	2600	0.143546	2	4	3	308642	5	2	32.4	24700000000
Chaitén	20	2008	layer alpha	1122	6	0	2	2	4100000000	0	1400000000	1400000000	0	17	0	4	0	15.878	950	16.1989	0.0134558	0.00173946	Unknown	na	10	101325	88489.5	2600	0.293095	2	4	1	189815	3	2	4	1400000000
Chaitén	21	2008	layer A-M	1122	60	2	24	2	260000000000	0	20000000000	20000000000	0	10	0	2	1	8.878	950	22.3608	0.0113963	0.00446846	Unknown	na	10	101325	88489.5	2600	0.10055	2	4	1	1.2037e+06	5	3	60	20000000000
Chaitén	22	2008	layer beta	1122	3.5	2	2.5	2	220000000000	0	47300000000	47300000000	0	21	1	3	2	19.878	950	21.4157	0.0163526	0.00172752	Unknown	na	10	101325	88489.5	2600	0.3373	2	4	1	1.74603e+07	3	4	1	47300000000
Puyehue-Cordón Caulle	24	2011	layer A-F	1470	27	2	3	2	450000000000	0	200000000000	200000000000	0	11.8	0	1.9	0	10.33	900	18.0152	0.0124357	0.0030807	4.5	0.5	10	101325	84849	2600	0.158459	2	4	1	4.62963e+06	5	3	27	200000000000
Puyehue-Cordón Caulle	25	2011	layer H	1470	9	2	3	2	130000000000	0	80000000000	80000000000	0	11.1	1	1.1	1	9.63	900	39.6277	0.0116892	0.00686481	4.5	0.5	10	101325	84849	2600	0.063125	3	4	1	4.01235e+06	3	3	9	80000000000
Puyehue-Cordón Caulle	26	2011	layer K2	1470	9.25	2	2.75	2	28000000000	0	14000000000	14000000000	0	7.6	0	2.2	0	6.13	900	32.7777	0.00995196	0.00883281	4.5	0.5	10	101325	84849	2600	0.0413598	3	4	1	840841	3	2	9.25	14000000000
Cotopaxi	27	2015	1st phase	5987	14	2	10	2	158000000	0	45000000	45000000	0	12.5	1	2.5	2	6.513	950	5.97439	0.00969627	0.00120763	Unknown	na	10	101325	49184.4	2600	0.234898	2	3	4	3134.92	4	1	4	45000000
Cotopaxi	28	2015	2nd phase	5987	580	2	300	2	765000000	0	164000000	165000000	0	8.5	1	1.5	2	2.513	950	5.7604	0.0110585	0.00264286	Unknown	na	10	101325	49184.4	2600	0.107207	2	3	2	366.379	6	1	280	165000000
Cotopaxi	29	2015	3rd phase	5987	390	2	200	2	228000000	0	50000000	57000000	0	8	1	1.5	2	2.013	950	3.75013	0.0117604	0.00205583	Unknown	na	10	101325	49184.4	2600	0.140284	2	3	2	162.393	6	1	190	57000000
Cotopaxi	30	2015	4th phase	5987	500	2	280	2	34900000	0	6200000	6300000	0	7.5	1	1	2	1.513	950	4.03037	0.0119993	0.00436485	Unknown	na	10	101325	49184.4	2600	0.100101	2	3	2	19.3889	6	1	220	6300000
El Chichón	31	1982	A1	1150	5.5	0	0.5	1	500000000000	0	262000000000	262000000000	1	17.5	1	5	2	16.35	800	6.6305	0.0121929	0.000696176	7	3	10	101325	88190.9	2600	0.668136	1	3	2	2.52525e+07	3	4	5.5	262000000000
Et-1	34	1998	22 July	3295	0.45	0	0.05	1	3000000000	1	2010000000	4100000000	0	11	1	3	2	7.705	1100	4.50388	0.0114026	0.000932087	Unknown	na	10	101325	68071.4	2600	0.433488	2	1	1	1.85185e+06	1	3	0.45	2010000000
Et-1	35	2001	21 July	2570	73.5	0	12	1	1750000000	0	875000000	875000000	0	4.25	1	0.85	1	1.68	1100	11.2274	0.0132926	0.0113894	Unknown	na	10	101325	74297.7	2600	0.0442007	3	1	2	6613.76	6	1	73.5	875000000
Et-1	41	2006	24 November	2800	11.5	0	1.5	0	180000000	0	100000000	100000000	1	4.8	0	0.6	0	2	1100	8.13423	0.0142733	0.00609029	Unknown	na	10	101325	72263.1	2600	0.0779874	3	1	1	4347.83	3	1	11.5	100000000
Et-1	42	2011	12 January	3200	1.66	0	0.17	1	150000000	0	40000000	40000000	0	9.2	0	2.4	1	6	1100	9.47478	0.0104995	0.00290419	Unknown	na	10	101325	68856.6	2600	0.147754	2	1	1	25100.4	2	2	1.49	40000000
Et-1	43	2013	23 February	3300	1.1	0	0.11	2	2000000000	0	1000000000	1000000000	0	8.1	0	1.5	1	4.8	1100	31.2054	0.0099706	0.0107734	Unknown	na	10	101325	68030.3	2600	0.0340817	3	1	1	505051	2	2	1.1	1000000000
Et-1	44	2013	26 October	3300	5.5	1	2.5	1	225000000	0	76000000	76000000	0	8	0	2	2	4.7	1100	7.22779	0.00980322	0.00281024	Unknown	na	10	101325	68030.3	2600	0.14166	2	1	1	11363.6	3	2	3	76000000
Et-1	45	2013	23 November	3300	0.62	0	0.21	0	1300000000	0	1100000000	1100000000	0	10.5	0	2.5	0	7.2	1100	34.4145	0.0126254	0.00858604	Unknown	na	10	101325	68030.3	2600	0.0586979	3	1	1	582437	1	2	0.62	1100000000
Et-1	46	2016	18 & 19 May	3300	5.17	0	1.08	0	35500000	0	24500000	24500000	0	5.5	0	1.5	0	2.2	1100	17.238	0.0111715	0.0117377	Unknown	na	10	101325	68030.3	2600	0.0316835	3	1	1	1907.37	3	1	4.09	24500000
Et-1	47	2016	21 May	3300	2.17	0	0.22	1	5550000	0	950000	950000	0	6	0	1	2	2.7	1100	23.3263	0.0106976	0.0138776	Unknown	na	10	101325	68030.3	2600	0.0275164	3	1	1	710.445	2	1	1.95	950000
Eyjafjallajökull	48	2010	14-16 April	1660	71	1	12	1	130000000000	0	30000000000	30000000000	0	5.7	0	0.6	1	4.04	1000	24.4968	0.0128148	0.0102286	1.7	Unknown	10	101325	82925	2600	0.0469646	3	2	2	508607	5	2	71	30000000000
Eyjafjallajökull	49	2010	17 April	1660	30	1	12	2	40000000000	0	10000000000	10000000000	0	5.6	0	0.6	1	3.94	1000	12.07	0.013823	0.00534569	1.7	Unknown	10	101325	82925	2600	0.100272	2	2	2	370370	5	2	42	10000000000
Eyjafjallajökull	50	2010	18 April - 21 May	1660	822	0	12.4	1	255000000000	0	127000000000	127000000000	0	4.6	0	0.5	0	2.94	1000	5.49535	0.0129033	0.00348444	1.7	Unknown	10	101325	82925	2600	0.153405	2	2	1	86171.9	6	2	834.4	127000000000
Eyjafjallajökull	51	2010	4-8 May	1660	90	0	0.5	0	29000000000	0	9700000000	9700000000	0	5.1	0	0.5	0	3.44	1000	12.6779	0.0123236	0.00610541	1.7	Unknown	10	101325	82925	2600	0.0743082	3	2	1	89506.2	6	2	90	9700000000
Grímsvötn	54	2004	Unit C	1400	18.1	0	0.5	2	27900000000	1	13900000000	13900000000	1	11	0	2.5	1	9.6	1100	27.0897	0.012299	0.00464873	Unknown	na	10	101325	85569	2600	0.0968557	3	1	2	428177	4	2	17.6	13900000000
Grímsvötn	55	2004	Unit E	1400	12.9	0	0.5	2	9940000000	1	4970000000	4970000000	1	8.8	0	2	1	7.4	1100	26.4526	0.0108501	0.00609079	Unknown	na	10	101325	85569	2600	0.0674505	3	1	2	214040	4	2	12.4	4970000000
Grímsvötn	56	2011	21 May	1450	27	1	3	1	729000000000	0	189000000000	189000000000	0	16	0	4	1	14.55	1100	5.31998	0.0167542	0.000548238	Unknown	na	10	101325	85054.1	2600	1.01827	1	1	2	7500000	5	3	27	189000000000
Hekla	57	1947	29 March brown-grey tephra	1447	0.5	0	0.1	2	119000000000	0	38000000000	38000000000	2	28	1	5	2	26.553	1000	31.9289	0.0185443	0.00233343	Unknown	na	10	101325	85084.9	2600	0.342711	2	2	3	6.61111e+07	1	4	0.4	38000000000
Hekla	58	1947	29 March brown-black tephra	1447	2	1	1.5	1	40000000000	0	20000000000	20000000000	2	16	1	6	2	14.553	1000	17.7929	0.0158336	0.00232042	Unknown	na	10	101325	85084.9	2600	0.287788	2	2	3	5.55556e+06	2	3	0.5	20000000000
Hekla	61	1991	17 January	1050	1	0	0.2	1	9800000000	0	1200000000	1200000000	0	11.5	0	1.2	0	10.45	1000	31.0485	0.0145024	0.00527801	1.2	0.4	10	101325	89262	2600	0.108468	2	2	3	2.72222e+06	2	3	1	1200000000
St. Helens	63	1980	18 May co-blast plume	2550	0.5	0	0.125	1	259000000000	0	160000000000	160000000000	1	28.5	0	5	2	25.95	900	11.1977	0.0175695	0.000449597	Unknown	na	10	101325	74477.3	2600	0.904807	1	4	1	1.43889e+08	1	4	0.5	160000000000
St. Helens	64	1980	18 May plinian	2550	9.5	0	0.95	2	259000000000	0	160000000000	160000000000	1	16.5	0	3	0	13.95	930	18.6755	0.0141632	0.0020782	4.6	1.1	10	101325	74477.3	2600	0.2351	2	4	1	7.5731e+06	3	3	9.5	160000000000
St. Helens	65	1980	25 May	2550	12	1	6.5	1	42000000000	0	15000000000	15000000000	2	9	1	3	1	6.45	900	8.81779	0.011346	0.00250868	Unknown	na	10	101325	74477.3	2600	0.184429	2	4	1	972222	4	2	12	15000000000
St. Helens	66	1980	12 June	2550	3.24	0	0.42	0	45000000000	0	16000000000	16000000000	2	10	1	4	1	7.45	900	12.5078	0.00970103	0.00266338	Unknown	na	10	101325	74477.3	2600	0.128404	2	4	1	3.85802e+06	3	3	3.24	16000000000
St. Helens	67	1980	22 July	2550	2.66	0	0.53	2	4000000000	0	1400000000	1400000000	2	12	1	3	2	9.45	900	17.7533	0.0108394	0.00311243	Unknown	na	10	101325	74477.3	2600	0.128217	2	4	1	417711	2	2	2.13	1400000000
St. Helens	68	2005	8 March	2100	0.45	0	0.25	0	250000000	2	125000000	650000000	2	8.5	0	2.5	1	6.4	900	15.9355	0.0109029	0.00437207	Unknown	na	10	101325	78635.1	2600	0.0973069	3	4	4	154321	1	2	0.2	650000000
Kelut	72	2014	Unit B	1731	2.325	0	0.7	0	497000000000	0	176000000000	176000000000	0	23	0	3	0	21.269	1000	13.0876	0.0151546	0.000982471	Unknown	na	10	101325	82217.2	2600	0.547295	1	3	1	5.93787e+07	2	4	2.325	176000000000
Merapi	74	2010	4 November	2968	36	1	12	1	22000000000	1	9130000000	23400000000	1	17	0	3	2	14.032	1000	5.67971	0.0108671	0.000829351	5	1	10	101325	70812.3	2600	0.596615	1	3	1	169753	5	2	24	23400000000
Soufrière Hills Montserrat	78	1997	26 September	915	1	0	0.3	2	550000000	0	185000000	185000000	1	11.3	0	3	2	10.385	1000	6.41727	0.0108008	0.00106917	Unknown	na	10	101325	90728.7	2600	0.388417	2	2	1	152778	2	2	0.7	185000000
Ontakesan	84	2014	27 September	2725	6	0	0.5	2	1000000000	0	514000000	941000000	0	6	0	1.5	1	3.275	1000	7.39796	0.0139121	0.00465592	Unknown	na	10	101325	72920.4	2600	0.136861	2	2	4	46296.3	3	2	6	514000000
Pi-1tubo	86	1991	Layer C	1750	6	0	3	0	4070000000000	0	1350000000000	1350000000000	0	32	0	3	1	30.25	900	15.998	0.0171193	0.00100437	6	1	10	101325	82028.9	2600	0.719339	1	4	1	1.88426e+08	3	4	6	1350000000000
Quizapu	90	1932	10 April	3150	22	0	4	0	9960000000000	0	7000000000000	15700000000000	0	23	1	7	1	19.85	870	22.0449	0.0177035	0.00143594	5	1	10	101325	69273.4	2600	0.354242	2	2	3	1.25758e+08	4	4	22	7000000000000
Redoubt	91	1989	14 December	3108	0.383333	0	0.0383333	2	750000000	0	350000000	350000000	0	9	0	3	1	5.892	1000	41.8336	0.0119438	0.0121187	0.25	0.15	10	101325	69625.6	2600	0.0373824	3	2	2	543478	1	2	0.383333	350000000
Redoubt	92	1989	15 December	3108	1.03333	0	0.103333	2	21200000000	0	6150000000	6150000000	0	11	2	4	2	7.892	1000	30.6177	0.0128595	0.00678063	0.25	0.15	10	101325	69625.6	2600	0.073659	3	2	2	5.69892e+06	2	3	1.13667	6150000000
Redoubt	93	1989	19 December	3108	0.15	0	0.015	2	500000000	0	100000000	100000000	0	6.5	0	2.5	0	3.392	1000	10.098	0.0156448	0.00587815	0.25	0.15	10	101325	69625.6	2600	0.116782	2	2	2	925926	1	2	0.165	100000000
Ruapehu	118	1996	17 June	2797	12.5	2	6	1	4510000000	0	1810000000	2690000000	0	8	0	1.5	1	5.203	1050	24.2283	0.00893118	0.00740296	1.5	0.8	10	101325	72289.3	2600	0.0426213	3	2	2	100222	4	2	12.5	1810000000
Santa Maria	119	1902	25 October	3772	19	0	1	0	16000000000000	0	7300000000000	52000000000000	0	28	1	14	2	24.228	900	7.26048	0.0173351	0.000628351	3.5	0.4	10	101325	64262.3	2600	1.28548	1	4	1	2.33918e+08	4	4	19	7300000000000
Shinmoedake - Kirishimayaya	121	2011	Phase SP1+SP2	1421	6	0	1	0	14400000000	1	8100000000	26300000000	0	7.3	0	1.3	0	5.879	970	31.231	0.0130168	0.00945777	4.4	0.6	10	101325	85352.4	2600	0.0544512	3	2	1	666667	3	2	6	8100000000
Shinmoedake - Kirishimayaya	122	2011	Phase SP3	1421	2	0	0.3	0	2400000000	0	1700000000	6700000000	0	7.4	0	1	0	5.979	970	25.5195	0.0123069	0.00817187	4.4	0.6	10	101325	85352.4	2600	0.0640757	3	2	1	333333	2	2	2	1700000000
Shishaldin	123	1999	19 April	2857	2.65	0	1.35	0	36400000000	0	22600000000	37000000000	2	14.5	0	2	1	11.643	1100	8.90264	0.0162477	0.000950631	Unknown	na	10	101325	71767.6	2600	0.4722	2	1	1	3.81551e+06	2	3	2.65	22600000000
Tungurahua	129	2001	4 August	5023	348	0	60	0	6150000000	0	3600000000	3600000000	0	8.4	0	1	1	3.377	1000	7.27734	0.0124363	0.00241241	Unknown	na	10	101325	55254.6	2600	0.128244	2	2	1	4909	6	1	288	3600000000
Tungurahua	130	2006	17 August	5023	5	0	1	0	24900000000	0	3240000000	3240000000	0	16	1	3	1	10.977	1000	6.19213	0.010114	0.000745584	1.9	1.5	10	101325	55254.6	2600	0.398434	2	2	1	1.38333e+06	3	3	5	3240000000
Tungurahua	131	2013	14 July	5023	1	0	0.333	1	672000000	0	50000000	50000000	0	11.4	1	2.3	1	6.377	1000	8.73581	0.0103376	0.0021283	Unknown	na	10	101325	55254.6	2600	0.167695	2	2	1	186667	2	2	0.667	50000000
Tungurahua	132	2014	1 February	5023	0.43	1	0.27	1	5400000000	0	810000000	23700000000	0	13.7	0	5.48	2	8.677	1000	5.78591	0.00934254	0.00114749	Unknown	na	10	101325	55254.6	2600	0.311351	2	2	1	3.48837e+06	1	3	0.43	810000000
Villarrica	134	2015	3 March	2847	0.42	0	0.15	1	1420000000	0	733000000	600000000	0	9.1	1	3	1	6.253	1100	6.60684	0.0100446	0.00145614	Unknown	na	10	101325	71854.3	2600	0.211258	2	1	1	939153	1	2	0.42	733000000
